# Supplementary material for: Eco-friendly and facile one-step synthesis of a three dimensional net-like magnetic mesoporous carbon derived from wastepaper as a renewable adsorbent
Source: Royal Society of Chemistry journal article supplement (doi:10.1039/c9ra01332f), 2019-01-01
Supplement: c9ra01332f1.pdf [file c9ra01332f1.pdf]

## Supplementary Information

for

### **“Eco-friendly and facile one-step synthesis of three dimension net-like magnetic mesoporous carbon derived from wastepaper as renewable adsorbent”**

Jing Yu,<sup>a</sup> Shukai Zhu,<sup>a,\*</sup> Pin Chen,<sup>a</sup> Gang-Tian Zhu,<sup>b</sup> Xiangtao Jiang,<sup>a</sup> Siyuan Di<sup>a</sup>

<sup>a</sup> State Key Laboratory of Biogeology and Environmental Geology, China University of Geosciences, Wuhan 430074, P. R. China.

<sup>b</sup> Key Laboratory of Tectonics and Petroleum Resources (Ministry of Education), China University of Geosciences, Wuhan 430075, P.R. China.

\*Corresponding author: Prof. Shukai Zhu, 388 Lumo road, China University of

Geosciences, Wuhan 430074, China

Tel.: 0086-27-67883452

E-mail: shukuizhu@126.com

**Synthesis of carbon material (C) without magnetism.** Carbon material (C) without magnetism was also prepared by dry-production method. The carbon source was filter paper. Firstly, paper was immersed in ethanol, and placed into the 300Hz ultrasonic system for 30 min. After 3 times washing, the treated paper was dried in a 60°C oven. The dried filter paper was heated at 750 °C in a tubular furnace under N<sub>2</sub> atmosphere with a heating rate 3 °C/min to the final products.

**Adsorption kinetics.** Kinetic study on adsorption can provide important information about the mechanism of the whole adsorption process. The adsorption kinetic models used in this study include the Lagergren pseudo-first order kinetics and the pseudo-second order kinetics,<sup>1</sup> which are expressed in equations (S1)-(S2) as listed below:

$$\ln(q_e - q_t) = \ln q_e - k_1 t \quad (\text{Eq. S1})$$

$$t / q_t = 1 / (k_2 q_e^2) + t / q_e \quad (\text{Eq. S2})$$

Where  $k_1$  and  $k_2$ , are the pseudo-first order, pseudo-second order rate constant, respectively;  $q_e$  is the amount of solute adsorbed (mg g<sup>-1</sup>) at equilibrium and  $q_t$  is the amount of solute on the surface of the adsorbent (mg g<sup>-1</sup>) at any time  $t$ .

### **Isotherm adsorption models.**

**Langmuir isotherm model.** Langmuir model treats the adsorption process uniform and leads to a monolayer. The linear expression for the Langmuir model is given by

$$\frac{C_e}{q_e} = \frac{1}{K_L q_m} + \frac{C_e}{q_m} \quad (\text{Eq. S3})$$

Where  $q_m$  ( $\text{mg g}^{-1}$ ) is the maximum adsorption capacity ( $\text{mg g}^{-1}$ ), and  $K_L$  ( $\text{mg}^{-1} \text{L}$ ) stands for the equilibrium adsorption constant.<sup>2</sup>

Using the Langmuir isotherm was possible to determine the equilibrium parameter known as the separation factor ( $R_L$ ), which is a dimensionless constant related to the propitiousness of the adsorption. This parameter can be calculated using Eq. S4

$$R_L = \frac{1}{1 + K_L C_0} \quad (\text{Eq. S4})$$

$R_L$  values indicate the adsorption process to be unfavorable if  $R_L > 1$ , linear if  $R_L = 1$ , favorable if  $0 < R_L < 1$ , and irreversible if  $R_L = 0$ .<sup>3</sup>

**Freundlich isotherm model.** The Freundlich isotherm model was used to investigate the non-ideal and reversible adsorption on a heterogeneous surface.<sup>4</sup> The linear Freundlich equation is expressed as

$$q_e = K_F C_e^{1/n} \quad (\text{Eq. S5})$$

where  $K_F$  ( $\text{mg g}^{-1}$ ) and  $n$  are the Freundlich constants that are related to the sorption capacity and intensity, respectively.

**Sips isotherm model.** It is a generalized nonlinear equation containing Langmuir and Freundlich isotherm models.<sup>5</sup> The model elucidates the surface heterogeneity in the heterogeneous systems and the equation was described by

$$q_e = \frac{q_m (K_s C_e)^{1/n_s}}{1 + (K_s C_e)^{1/n_s}} \quad (\text{Eq. S6})$$

where  $k_s$  (L mg<sup>-1</sup>) is the Langmuir median association constant, and  $n_s^{-1}$  is the Freundlich heterogeneity factor.

**Redlich-Peterson isotherm model.** It is a hybrid of Langmuir and Freundlich isotherm model.<sup>6</sup>

The empirical equation for Redlich-Peterson model is given by

$$q_e = \frac{AC_e}{(1 + BC_e^\beta)} \quad (\text{Eq. S7})$$

Where A (L g<sup>-1</sup>), B (L mg<sup>-1</sup>) and  $\beta$  are Redlich-Peterson constants and the exponent  $\beta$  ranges from 0 to 1. This model applies to both homogeneous and heterogeneous systems.

#### **Adsorption thermodynamics.**

Adsorption thermodynamics were measured by varying the temperature of the reaction systems.

Thermodynamic parameters including standard Gibbs free energy ( $\Delta G^\circ$ ), enthalpy ( $\Delta H^\circ$ ) and entropy ( $\Delta S^\circ$ ) were calculated by the following equations:

$$\Delta G^\circ = -RT \ln k_d \quad (\text{Eq. S8})$$

$$\Delta G^\circ = \Delta H^\circ - \Delta S^\circ \quad (\text{Eq. S9})$$

$$k_d = (C_0 - C_e) / C_e \quad (\text{Eq. S10})$$

$$\ln k_d = -\left(\frac{\Delta H^\circ}{RT}\right) + \frac{\Delta S^\circ}{R} \quad (\text{Eq. S11})$$

where R (8.314 J/K mol) is the universal gas constant, T (K) is the temperature of adsorption interaction system,  $k_d$  is the equilibrium constant,  $C_0$  (mg/L) is the initial concentration in solution and  $C_e$  (mg/L) is the equilibrium concentration. Values of  $\Delta H^\circ$  and  $\Delta S^\circ$  were calculated from the  $\ln k_d$  versus  $1/T$  plot by the linear regression method.<sup>7</sup>

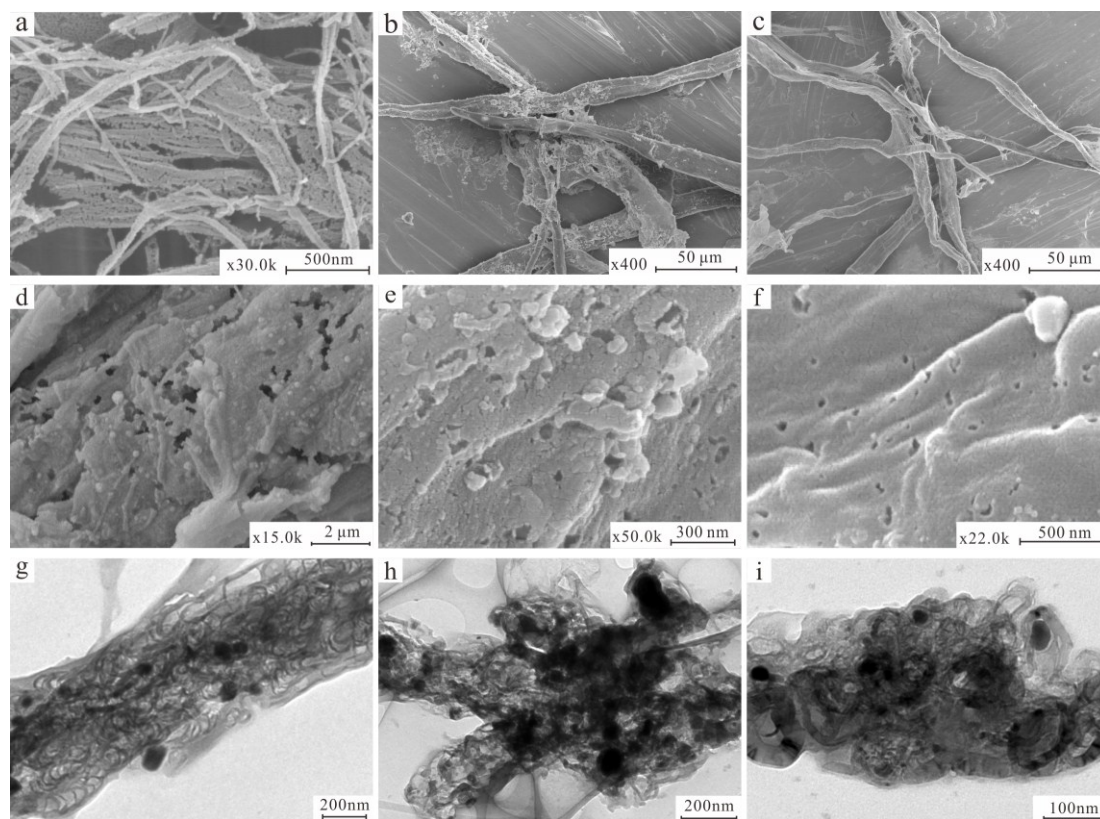

**Fig. S1** SEM and TEM images of filter paper, printer paper and napkins. SEM images of filter paper (a), printer paper (b) and napkins (c) immersed in ferric nitrate solution for 2 h and then dried. SEM images of filter paper (d), printer paper (e) and napkins (f) immersed in ferric nitrate solution and then calcined at 750°C in a nitrogen atmosphere. TEM images (g~i) corresponding to d~f, respectively.

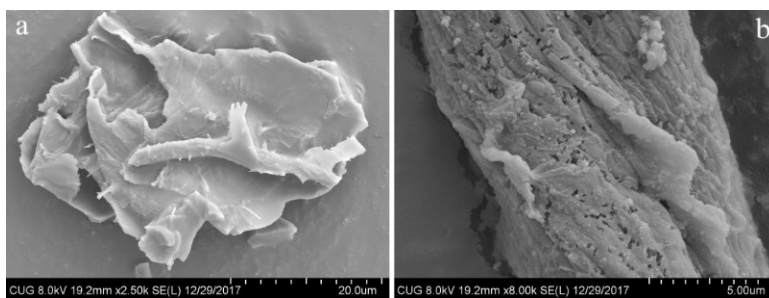

**Fig. S2** SEM images of carbon material derived from filter paper after calcination. (a) filter paper without immersion of ferric nitrate solution; (b) iron ion saturated filter paper.

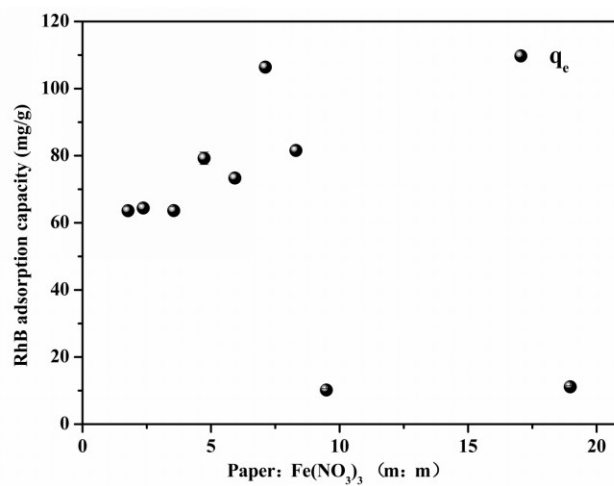

**Fig. S3** Optimization of the Paper:Fe(NO<sub>3</sub>)<sub>3</sub> (m:m) ratio.

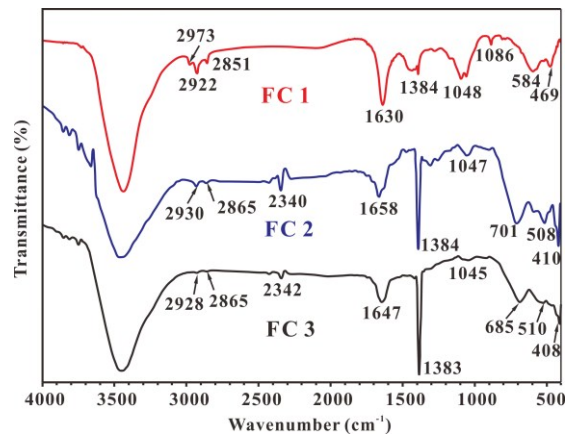

**Fig. S4** FTIR spectra of FC1, FC2 and FC3.



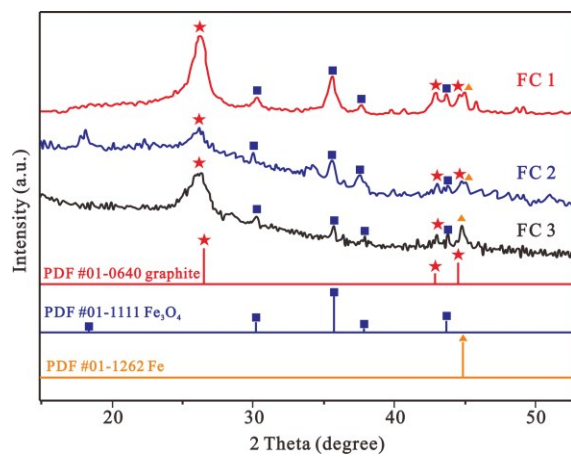

**Fig. S5** XRD patterns of FC1, FC2 and FC3.

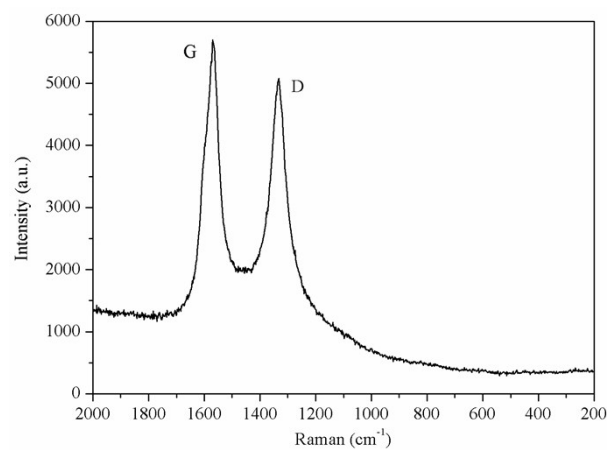

**Fig. S6** Raman spectrum of the 3D net-like magnetic mesoporous carbon derived from filter paper.

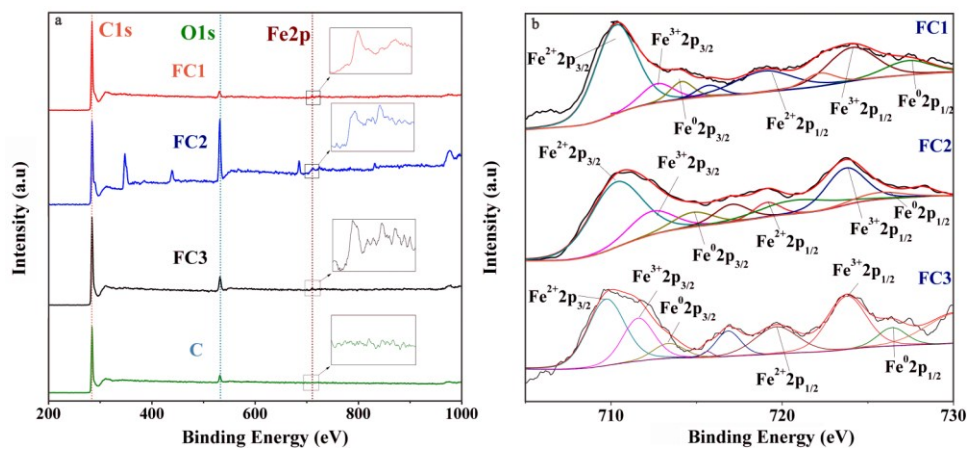

**Fig. S7** XPS spectra (a) and Fe 2p spectra (b) of FC1, FC2, FC3 and C.

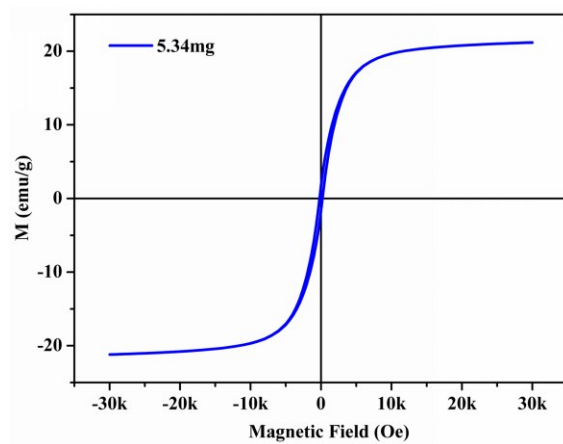

**Fig. S8** VSM magnetization curve of 3D net-like magnetic mesoporous carbon derived from filter paper.

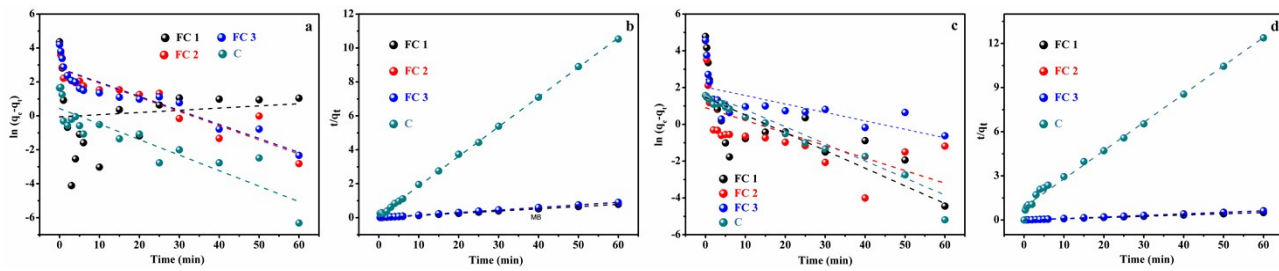

**Fig. S9** Pseudo-first-order kinetics (a and c) and pseudo-second-order kinetic models (b and d) for the adsorption of MB and RhB onto FC1, FC2, FC3 and C. (Conditions: initial concentration of MB and RhB: 50 mg L<sup>-1</sup>; amount of adsorbents for MB and RhB: 8 mg; sample volume of MB and RhB: 20 mL; pH of MB and RhB: 7; Temperature: 25°C)

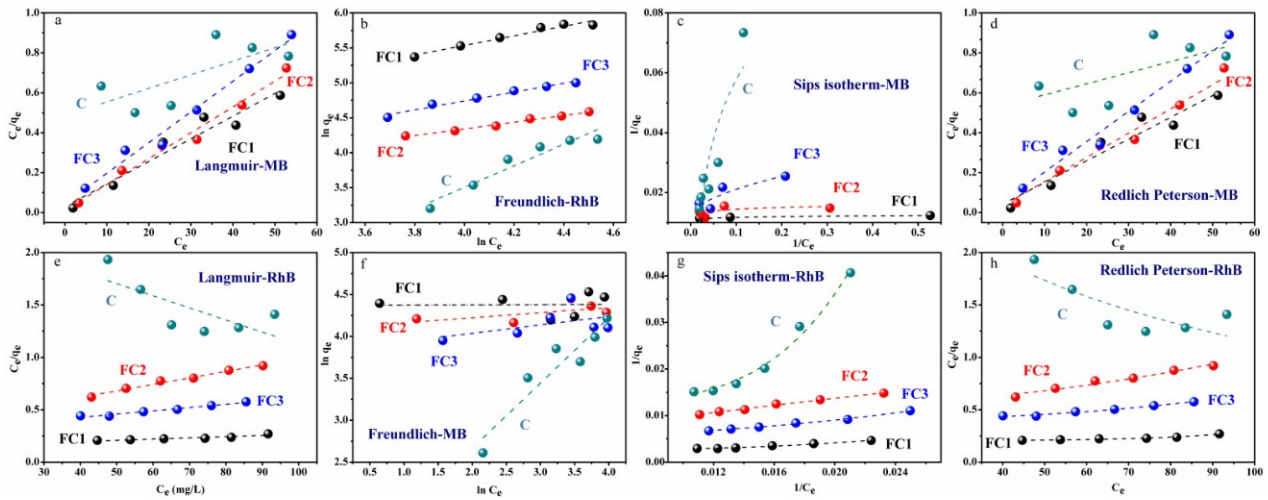

**Fig. S10** Fitting curve of Langmuir, Freundlich, Sips isotherm and Redlich-Peterson model for the equilibrium adsorption data of MB (a~d) and RhB (e~h) by FC1, FC2, FC3 and C. (Conditions: amount of adsorbents for MB: 8 mg; amount of adsorbents for RhB: 2 mg; sample volume of MB and RhB: 20 mL; pH of MB and RhB: 7; temperature: 50°C)

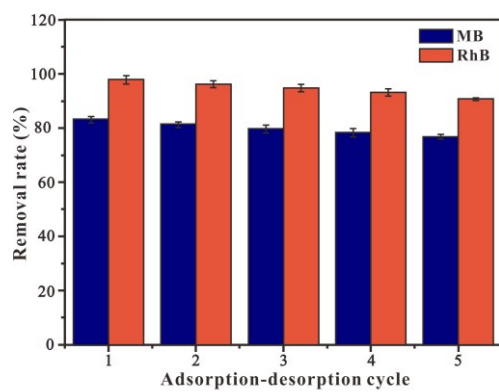

**Fig. S11** Reusability of FC1 after 5 cycles. Error bars represent the standard error of the average value for measurement carried out in triplicate.

**Table S1** Chemical structures and selected properties of MB and RhB.

| Dye | Structure                                                                         | $\rho$ | $M_W$  | $D_m(\text{\AA})$ |
|-----|-----------------------------------------------------------------------------------|--------|--------|-------------------|
| MB  | 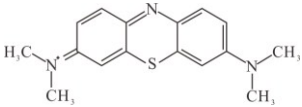 | 1.00   | 319.86 | 15.10             |
| RhB |  | 0.79   | 479.01 | 17.08             |



**Table S2** Adsorption kinetic parameters of MB and RhB adsorption by FC1, FC2, FC3 and C.

| Dye | Adsorbent | Pseudo-first-order            |                                      |                | Pseudo-second-order                  |                                                  |                | $q_{e,exp}$<br>(mg g <sup>-1</sup> ) |
|-----|-----------|-------------------------------|--------------------------------------|----------------|--------------------------------------|--------------------------------------------------|----------------|--------------------------------------|
|     |           | $K_1$<br>(min <sup>-1</sup> ) | $q_{e,cal}$<br>(mg g <sup>-1</sup> ) | R <sup>2</sup> | $q_{e,cal}$<br>(mg g <sup>-1</sup> ) | $K_2$<br>(g mg <sup>-1</sup> min <sup>-1</sup> ) | R <sup>2</sup> |                                      |
| MB  | FC1       | 2.77                          | 80.64                                | 0.9791         | 76.34                                | 0.12                                             | 0.9999         | 78.80                                |
|     | FC2       | 0.08                          | 15.96                                | 0.8284         | 68.03                                | 0.03                                             | 0.9995         | 67.54                                |
|     | FC3       | 0.08                          | 16.61                                | 0.8454         | 66.67                                | 0.03                                             | 0.9998         | 66.40                                |
|     | C         | 0.09                          | 1.55                                 | 0.7840         | 5.88                                 | 0.23                                             | 0.9995         | 5.70                                 |
| RhB | FC1       | 0.09                          | 5.10                                 | 0.4823         | 119.05                               | 0.08                                             | 0.9999         | 117.76                               |
|     | FC2       | 0.07                          | 2.40                                 | 0.3486         | 94.97                                | 0.27                                             | 0.9999         | 94.06                                |
|     | FC3       | 0.08                          | 2.12                                 | 0.4611         | 96.81                                | 0.27                                             | 0.9999         | 95.78                                |
|     | C         | 0.04                          | 13.7                                 | 0.5984         | 5.20                                 | 0.04                                             | 0.9926         | 4.8                                  |

**Table S3** Isotherm parameters for adsorption of MB and RhB by FC1, FC2, FC3 and C.

| Model                       | MB                     |                       |       |                      | RhB                    |                        |                        |       |
|-----------------------------|------------------------|-----------------------|-------|----------------------|------------------------|------------------------|------------------------|-------|
|                             | FC1                    | FC2                   | FC3   | C                    | FC1                    | FC2                    | FC3                    | C     |
| Langmuir                    |                        |                       |       |                      |                        |                        |                        |       |
| $q_m$ (mg g <sup>-1</sup> ) | 82.1                   | 71.4                  | 65.4  | 147.5                | 862.1                  | 161.3                  | 322.6                  | 100.0 |
| $K_L$ (mg <sup>-1</sup> L)  | 0.38                   | 1.00                  | 0.35  | 0.01                 | 0.01                   | 0.02                   | 0.01                   | 0.01  |
| $R^2$                       | 0.928                  | 0.977                 | 0.980 | 0.387                | 0.826                  | 0.980                  | 0.957                  | 0.425 |
| Freundlich                  |                        |                       |       |                      |                        |                        |                        |       |
| $K_F$ (mg g <sup>-1</sup> ) | 79.0                   | 60.4                  | 46.3  | 3.0                  | 16.3                   | 11.3                   | 9.0                    | 0.1   |
| $n$                         | 331.12                 | 16.67                 | 9.94  | 1.28                 | 1.46                   | 2.09                   | 1.58                   | 0.65  |
| $R^2$                       | 0.249                  | 0.161                 | 0.069 | 0.864                | 0.949                  | 0.985                  | 0.972                  | 0.911 |
| Sips                        |                        |                       |       |                      |                        |                        |                        |       |
| $q_m$ (mg g <sup>-1</sup> ) | 2.0                    | 0.2                   | 83.1  | 0.1                  | 377.4                  | 100.0                  | 177.0                  | 77.5  |
| $k_s$ (L mg <sup>-1</sup> ) | $2.06 \times 10^{-11}$ | $2.81 \times 10^{-9}$ | 0.16  | 75.99                | 0.016                  | 0.024                  | 0.018                  | 0.017 |
| $1/n_s$                     | $7.6 \times 10^{-4}$   | $1.4 \times 10^{-4}$  | 0.6   | $2.5 \times 10^{-3}$ | 1.1                    | 0.9                    | 1.2                    | 1.3   |
| $R^2$                       | 0.251                  | 0.095                 | 0.350 | 0.679                | 0.976                  | 0.990                  | 0.990                  | 0.987 |
| Redlich-Peterson            |                        |                       |       |                      |                        |                        |                        |       |
| $A$ (L g <sup>-1</sup> )    | 23.4                   | 29.0                  | 19.2  | 1.9                  | 4.8                    | 1.8                    | 2.5                    | 0.03  |
| $B$ (L mg <sup>-1</sup> )   | 0.25                   | 0.35                  | 0.29  | 0.01                 | $6.61 \times 10^{-11}$ | $2.19 \times 10^{-11}$ | $2.29 \times 10^{-11}$ | 0.87  |
| $\beta$                     | 0.99                   | 0.98                  | 0.97  | 0.99                 | 4.91                   | 1.81                   | 2.22                   | 0.02  |
| $R^2$                       | 0.941                  | 0.978                 | 0.984 | 0.488                | 0.961                  | 0.982                  | 0.971                  | 0.387 |

**Table S4**  $R_L$  values calculated from Eq. S4.

| $C_0$ (mg/L) | FC1   | FC2   | FC3   |
|--------------|-------|-------|-------|
| 10           | 0.208 | 0.091 | 0.969 |
| 20           | 0.116 | 0.048 | 0.984 |
| 30           | 0.081 | 0.032 | 0.989 |
| 40           | 0.062 | 0.024 | 0.992 |
| 50           | 0.050 | 0.020 | 0.993 |
| 60           | 0.042 | 0.016 | 0.994 |

## References:

1. F. Zhao, E. Repo, Y. Song, D. Yin, S. Ben Hammouda, L. Chen, S. Kalliola, J. Tang, K. C. Tam and M. Sillanpaa, *Green Chem.*, 2017, **19**, 4816-4828.
2. I. Langmuir, *J. Am. Chem. Soc.* 1916, **38**, 2221–2295.
3. E. F. Lessa, M. S. Gularte, E. S. Garcia and A. R. Fajardo, *Carbohydr. Polym.*, 2017, **157**, 660-668.
4. X. Zheng, E. Liu, F. Zhang, Y. Yan and J. Pan, *Green Chem.*, 2016, **18**, 5031-5040.
5. R. Sips, *J. Chem. Phys.* 1948, **16**, 490–495.
6. O. Redlich, D.L. Peterson, *J. Phys. Chem.* 1959, **63**, 1024.
7. B. C. Melo, F. A. A. Paulino, V. A. Cardoso, A. G. B. Pereira, A. R. Fajardo and F. H. A. Rodrigues, *Carbohydr. Polym.*, 2018, **181**, 358-367.
